# Supplementary material
Source: publisher site journal article supplement (https://www.dovepress.com/article/601451)
Supplement: Supplementary file 1 [file 601451%20Revised%20Supplement%201.docx]

**Supplement 1: Additional Information**

Some readers may be unfamiliar with some of the statistical terms used in this article and so we have provided some additional reading to support understanding, mostly from Janet L Peacock and Phil J Peacock *Oxford Handbook of Medical Statistics 2nd edition* Oxford University Press, 2020, (OHMS2) which is available in print or online <https://doi.org/10.1093/med/9780198743583.001.0001>

The table below lists the statistical terms used in this article and provides a link to the chapter (Ch) and section (§) where this is described in OHMS2, but please note that specific concepts may also be referred to elsewhere in OHMS2.

| **Statistical term** | **Additional reading in OHMS2 unless stated otherwise** |
| --- | --- |
| Statistical Analysis Plan (SAP) | Ch 2 Research design, § Statistical analysis plan |
| Flowchart | Ch 4 Presenting research findings, § Research articles: results section |
| Confidence interval | Ch 8 Statistical tests, § Confidence interval for a mean |
| Credible interval | Ch 14 Bayesian statistics, § Summarizing and presenting results |
| P-value | Ch 8 Statistical tests, § P values |
| Null hypothesis | Ch 8 Statistical tests, § Tests of statistical significance |
| Pearson’s correlation coefficient | Ch 8 Statistical tests, § Pearson’s correlation |
| Minimum Clinically Important Difference (MCID) | Ch 2 Research design, § Sample size for comparative studies: means |
| Risk difference, risk ratio (relative risk) | Ch 8 Statistical tests, § Estimates for tests of proportions |
| Z-scores | <https://doi.org/10.1136/bmjopen-2021-052338> |
| Normal distribution | Ch 7 Probability and distributions, § Normal distribution |
| Regression modeling | Ch 12Analysing multiple variables per subject, § Multiple variables per subject |
| Logarithmic transformation | Ch 6 Summarizing data, § Geometric mean; Ch 8 Statistical tests, § Transforming data |
| Positively skew | Ch 8 Statistical tests, § Transforming data |
| Standard deviation | Ch 6 Summarizing data, § Summarising quantitative data |
| Competing risks | <https://doi.org/10.2147/CLEP.S574928> |
| Subdistribution hazard ratio | <https://doi.org/10.2147/CLEP.S574928> |
| Number Needed to Treat (NNT) | Ch 10 Other statistical methods, § Number needed to treat |
| Number Needed to Harm (NNH) | Ch 10 Other statistical methods, § Number needed to harm |
